# Supplementary material for: The DNA damage sensor ATM kinase interacts with the p53 mRNA and guides the DNA damage response pathway
Source: PubMed Central journal article supplement (PMC10804554; doi:10.1186/s12943-024-01933-z), 2024-01-23
Supplement: 12943_2024_1933_MOESM4_ESM.pdf [file 12943_2024_1933_MOESM4_ESM.pdf]

**a**

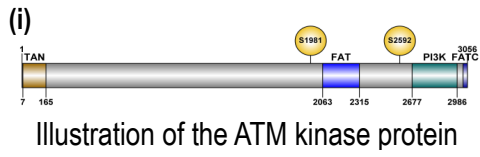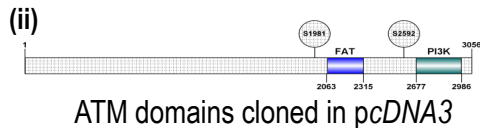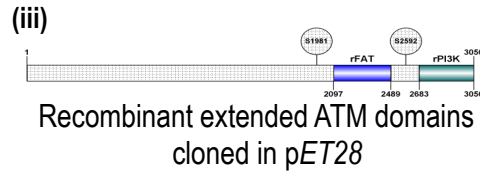

(iv)

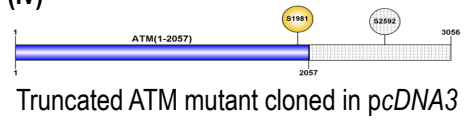

(v)

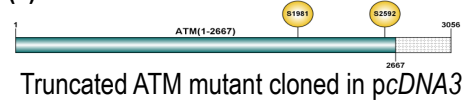

**b**

PLA: ATM – p53 mRNA

|                |                         |
|----------------|-------------------------|
| Cell line:     | H1299                   |
| Hybridisation: | Biotinylated p53 probe  |
| Antibodies:    | anti-FLAG; anti-biotin. |

Expression:

p53;  
FLAG-ATM

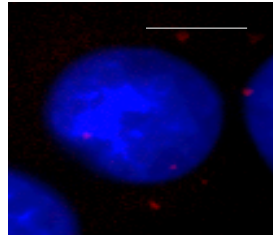

p53;  
FLAG-ATM;  
HA-FAT

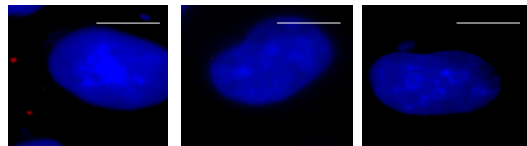

p53;  
FLAG-ATM;  
HA-PI3K

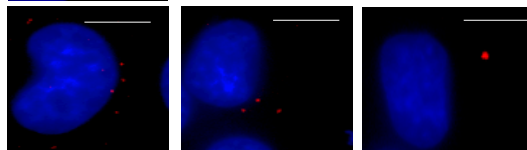

p53;  
FLAG-ATM;  
HA-FAT & HA-PI3K

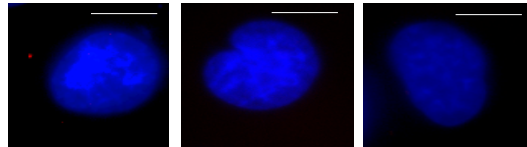

1.5nM

3nM

4.5nM
