# Supplementary material for: The DNA damage sensor ATM kinase interacts with the p53 mRNA and guides the DNA damage response pathway
Source: PubMed Central journal article supplement (PMC10804554; doi:10.1186/s12943-024-01933-z), 2024-01-23

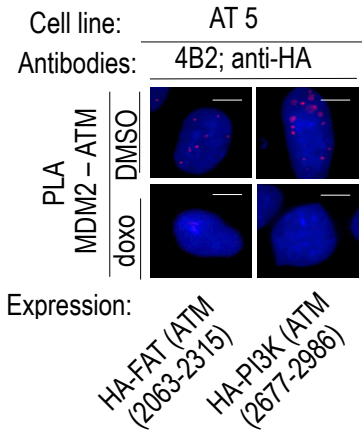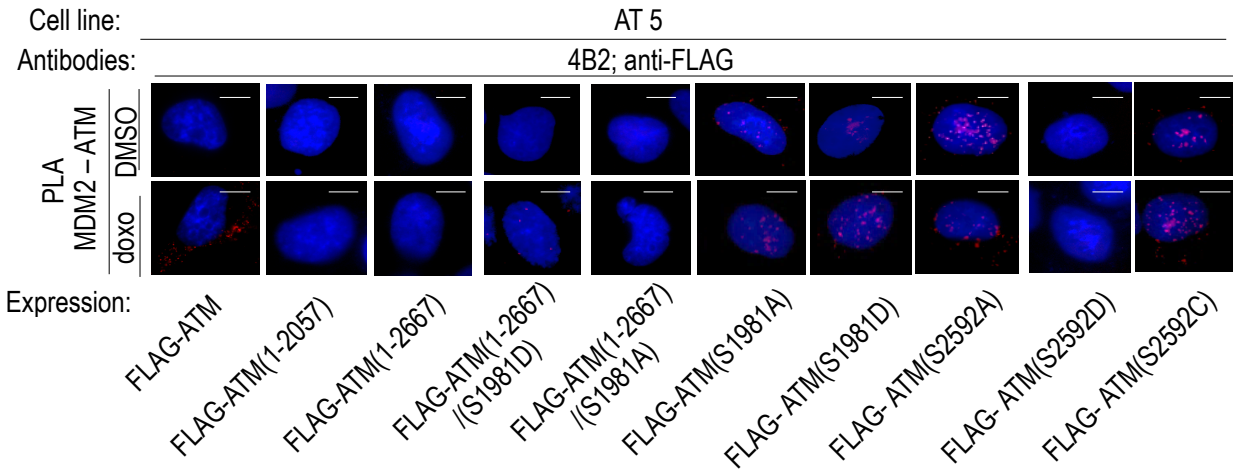

Supplement: 12943_2024_1933_MOESM5_ESM.pdf [file 12943_2024_1933_MOESM5_ESM.pdf]
